# Supplementary material for: Enhancement of Biomass Production of Diatom Nitzschia sp. S5 through Optimisation of Growth Medium Composition and Fed-Batch Cultivation
Source: MDPI journal article supplement (doi:10.3390/md22010046), 2024-01-17
Supplement: s1 [file s1]

# Supplementary Marine drugs

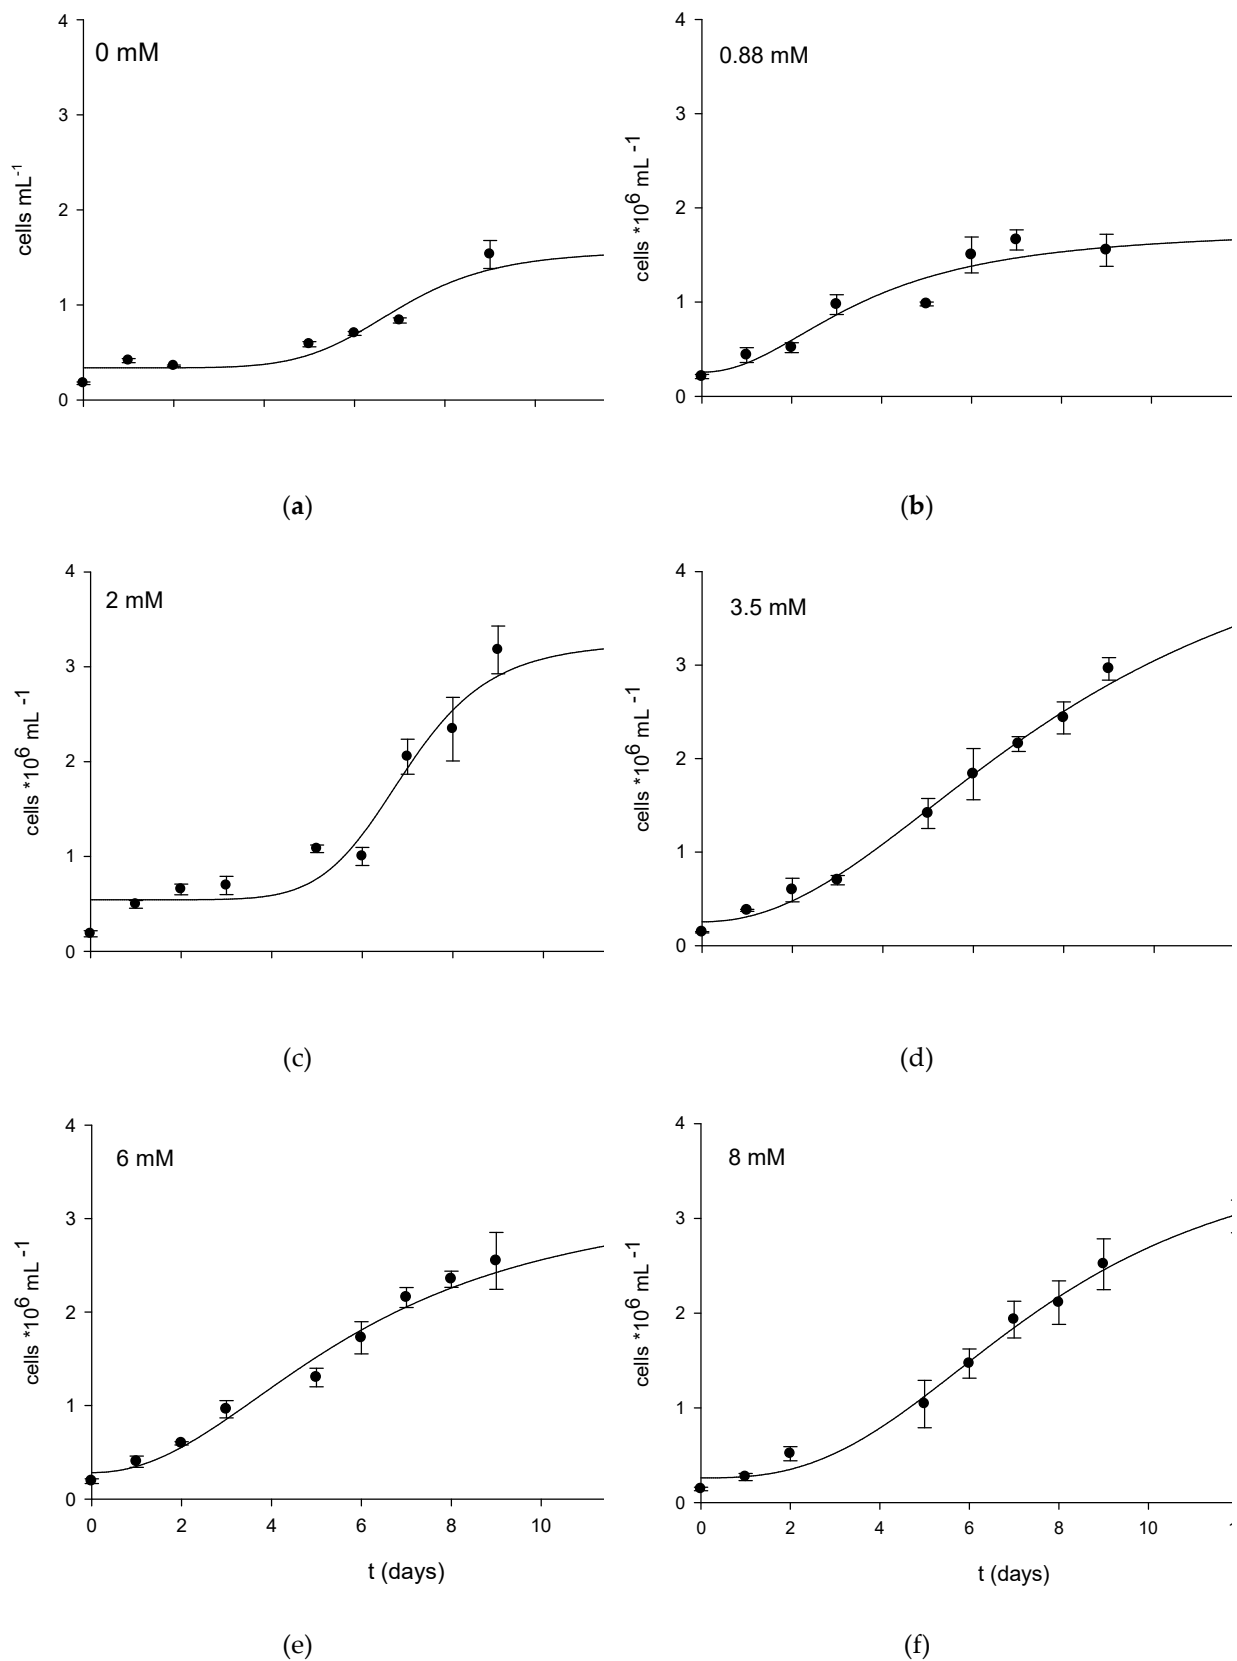

**Figure S1.** Growth curves of diatom *Nitzschia* sp. S5 grown in f/2 medium with different nitrogen concentrations: (a) 0 mM; (b) 0.88 mM; (c) 2 mM; (d) 3.5 mM; (e) 6 mM; (f) 8 mM.

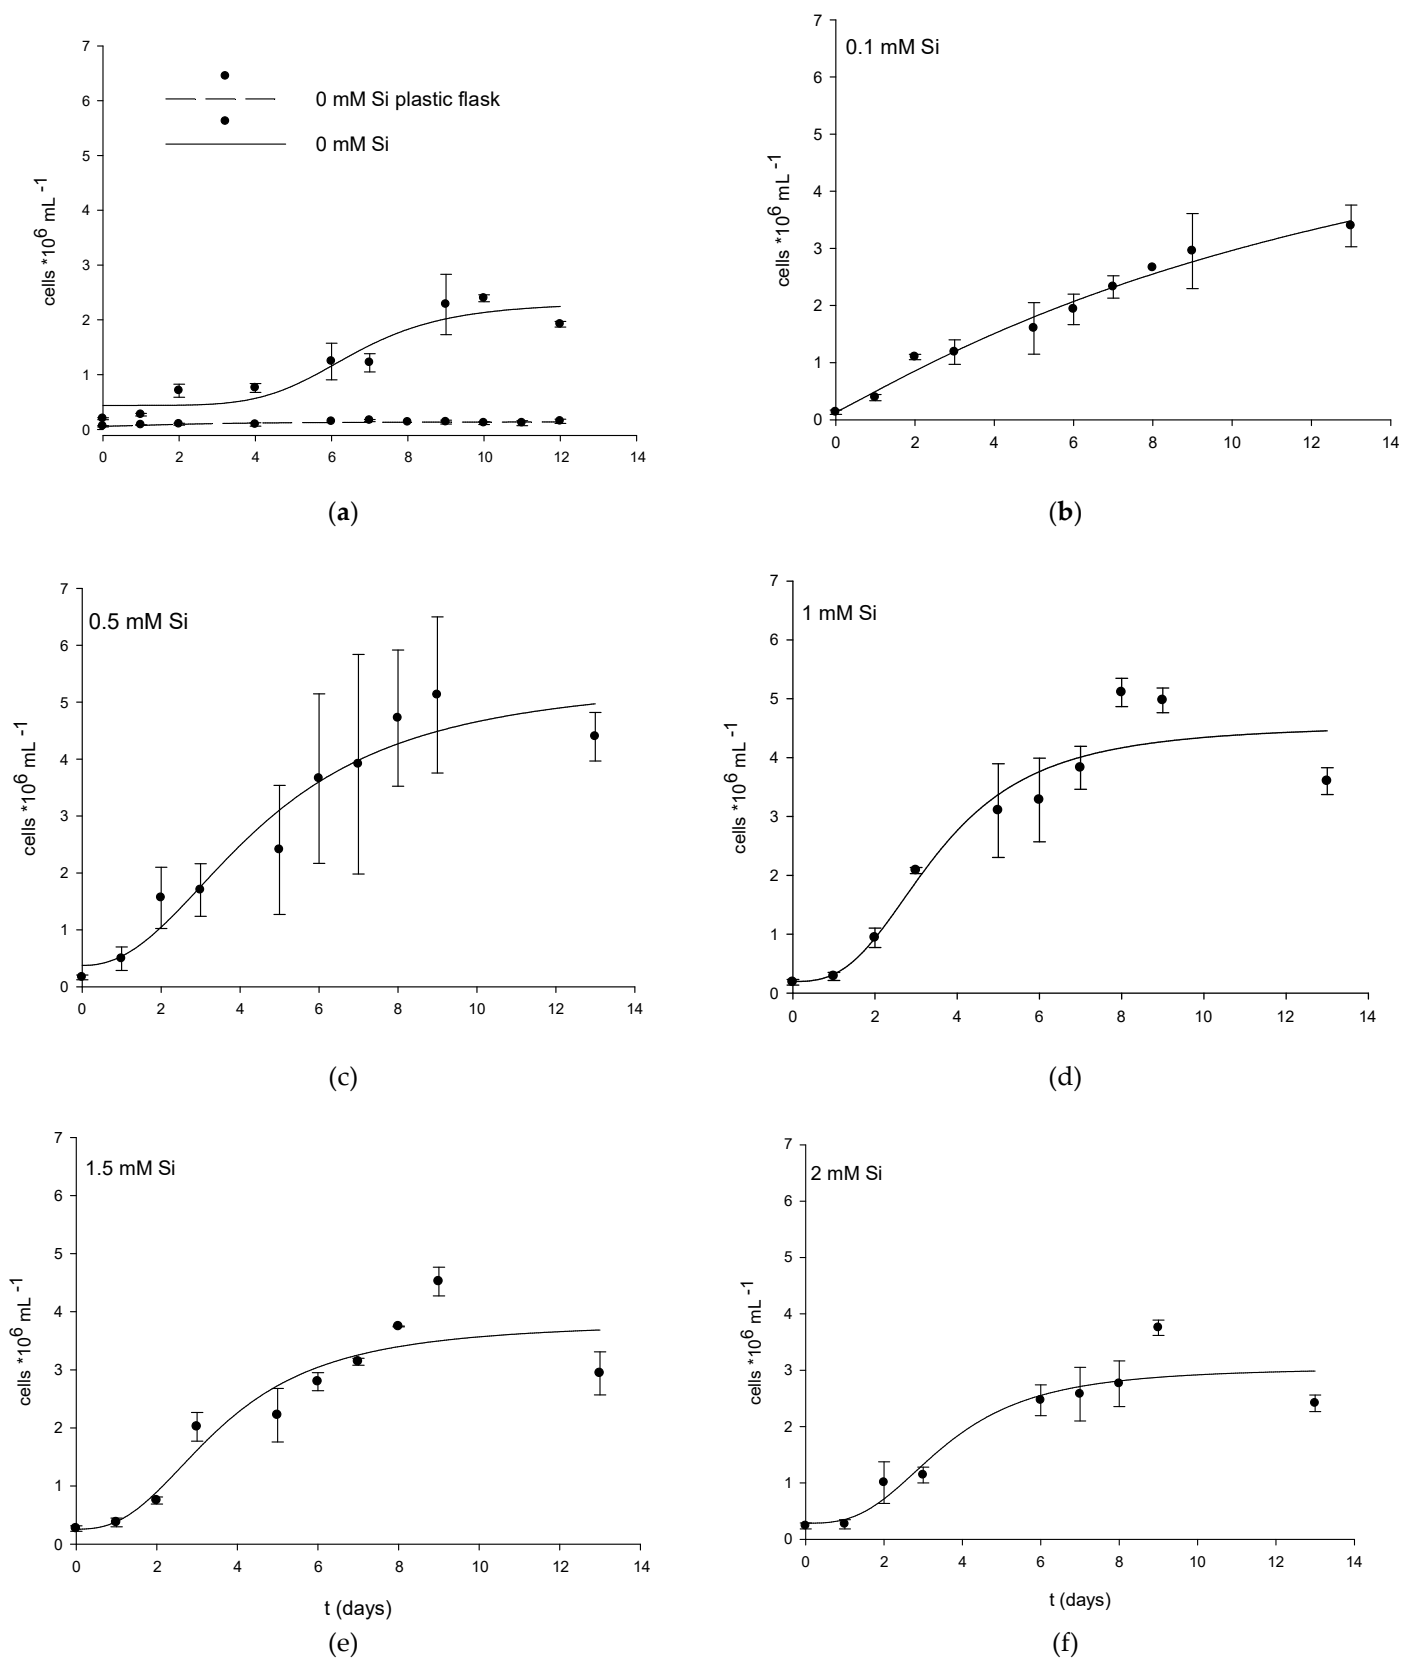

**Figure S2.** Growth curves of diatom *Nitzschia* sp. S5 in f/2 medium with different silicon concentrations: (a) 0 mM in glass and plastic\* Erlenmeyer flasks; (b) 0.1 mM; (c) 0.5 mM; (d) 1 mM; (e) 1.5 mM; (f) 2 mM. \*To evaluate the effect of silicon leaching from glass Erlenmeyer flask on diatom

growth under silicon deprivation condition the cultivation was conducted in plastic Erlenmeyer flask.

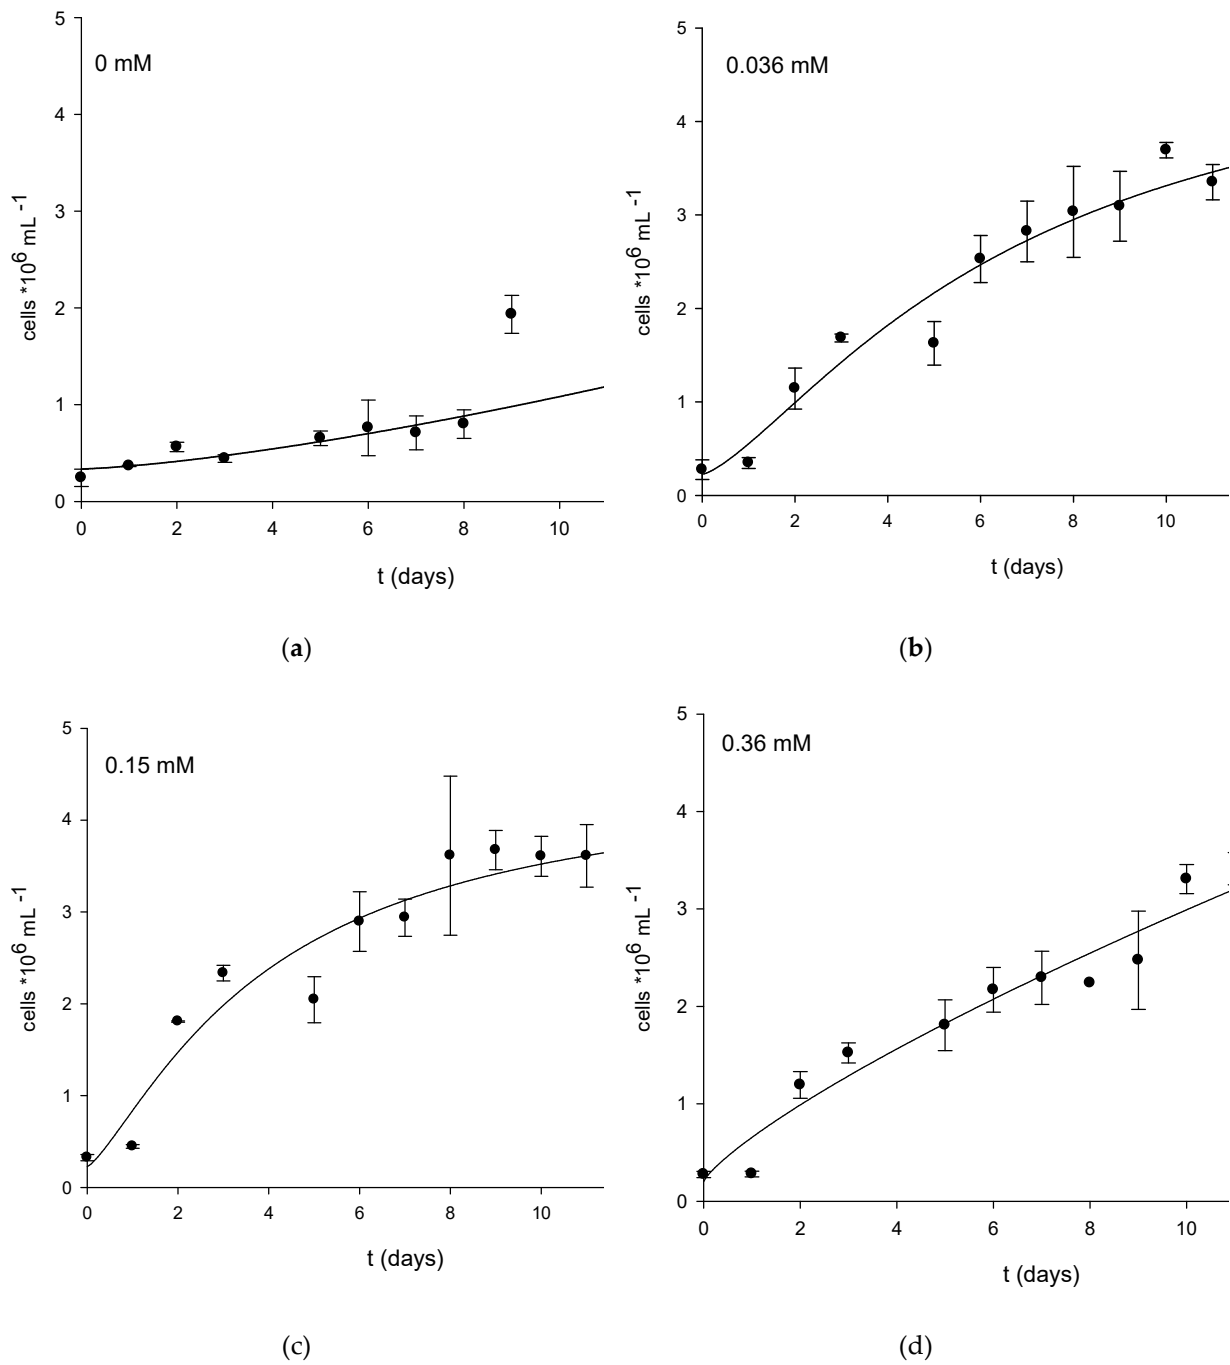

**Figure S3.** Growth curves of diatom *Nitzschia* sp. S5 at different phosphate concentrations in f/2 medium: (a) 0 mM; (b) 0.036 mM; (c) 0.15 mM; (d) 0.36 mM.

**Table S1.** Consumption of nitrogen, silicon and phosphate at beginning and at the end of cultivation of *Nitzschia* sp. S5 with different macronutrient concentrations in f/2 medium and their ratios.

| C (mM)                          | $\gamma_{N-NO_3^-}$ (mg L <sup>-1</sup> ) |                    | $\gamma_{Si}$ (mg L <sup>-1</sup> ) |                    | $\gamma_{PO_4^{3-}}$ (mg L <sup>-1</sup> ) |                    |
|---------------------------------|-------------------------------------------|--------------------|-------------------------------------|--------------------|--------------------------------------------|--------------------|
|                                 | t <sub>0</sub>                            | t <sub>final</sub> | t <sub>0</sub>                      | t <sub>final</sub> | t <sub>0</sub>                             | t <sub>final</sub> |
| N-NO <sub>3</sub> <sup>3-</sup> | 0.00                                      | 0                  |                                     | 0.07±0.03          |                                            | 0.00±0.00          |
|                                 | 0.88                                      | 12.32              |                                     | 0.19±0.05          |                                            | 0.00±0.00          |
|                                 | 2.00                                      | 28.01              | 2.81*                               | 0.01±0.004         | 3.42*                                      | 0.00±0.00          |
|                                 | 3.50                                      | 49.02              |                                     | 0.30±0.23          |                                            | 0.00±0.00          |
|                                 | 6.00                                      | 84.04              |                                     | 0.99±0.42          |                                            | 0.00±0.00          |
|                                 | 8.00                                      | 112.05             |                                     | 0.97±0.11          |                                            | 0.00±0.00          |
| Si                              | 0.0**                                     |                    | 0                                   | 0.05±0.03          |                                            | 0.00±0.00          |
|                                 | 0.0                                       |                    | 0                                   | 0.04±0.03          |                                            | 0.00±0.00          |
|                                 | 0.1                                       |                    | 2.81                                | 0.17±0.07          |                                            | 0.00±0.00          |
|                                 | 0.5                                       | 12.32*             | 14.04                               | 0.37±0.52          | 3.42*                                      | 0.00±0.00          |
|                                 | 1.0                                       |                    | 28.09                               | 1.56±0.28          |                                            | 0.00±0.00          |
|                                 | 1.5                                       |                    | 42.13                               | 1.32±0.10          |                                            | 0.00±0.00          |
|                                 | 2.0                                       |                    | 56.17                               | 1.22±0.07          |                                            | 0.00±0.00          |
| PO <sub>4</sub> <sup>3-</sup>   | 0                                         |                    |                                     | 0.00±0.00          | 0.00                                       | 0.00±0.00          |
|                                 | 0.036                                     | 12.32*             | 2.81*                               | 0.00±0.00          | 3.42                                       | 0.00±0.00          |
|                                 | 0.15                                      |                    |                                     | 0.00±0.00          | 14.25                                      | 0.00±0.00          |
|                                 | 036                                       |                    |                                     | 0.04±0.02          | 34.19                                      | 3.79±0.76          |
| Modified f/2                    |                                           |                    |                                     |                    |                                            |                    |
| Ratio 1                         | 28.01                                     | 2.67±0.70          | 11.23                               | 0.20±0.06          | 3.42                                       | 0.04±0.01          |
| Ratio 2                         | 28.01                                     | 3.48±0.85          | 11.23                               | 0.07±0.02          | 13.68                                      | 0.70±0.29          |
| Ratio 3                         | 49.02                                     | 3.95±0.92          | 28.09                               | 0.20±0.13          | 13.68                                      | 0.12±0.05          |
| Ratio 4                         | 84.04                                     | 3.48±2.84          | 28.09                               | 0.20±0.09          | 13.68                                      | 0.07±0.06          |
| Ratio 5                         | 49.02                                     | 11.99±1.13         | 28.09                               | 2.08±1.42          | 20.51                                      | 1.41±0.69          |
| Ratio 6                         | 49.02                                     | 8.07±0.56          | 28.09                               | 2.11±0.47          | 27.35                                      | 1.91±0.15          |
| Control                         | 12.33                                     | 8.72±0.42          | 2.81                                | 0.10±0.08          | 3.42                                       | 0.24±0.12          |

\*same concentration of macronutrient for experimental set.

\*\*plastic Erlenmeyer flasks were used.

**Table S2.** Consumption of nitrogen, silicon and phosphate during fed- batch cultivation of diatom *Nitzschia* sp. S5.

| Cultivation mode      | $\gamma_{N-NO_3^-}$ (mg L <sup>-1</sup> ) |                    | $\gamma_{Si}$ (mg L <sup>-1</sup> ) |                    | $\gamma_{PO_4^{3-}}$ (mg L <sup>-1</sup> ) |                    |
|-----------------------|-------------------------------------------|--------------------|-------------------------------------|--------------------|--------------------------------------------|--------------------|
|                       | t <sub>0</sub>                            | t <sub>final</sub> | t <sub>0</sub>                      | t <sub>final</sub> | t <sub>0</sub>                             | t <sub>final</sub> |
| Batch                 | 49.02                                     | 17.23              | 28.09                               | 0.42               | 13.68                                      | 1.87±0.07          |
| Fed batch             |                                           |                    |                                     |                    |                                            |                    |
| I nutrient addition   | 35.83                                     | 9.26±0.77          | 11.62                               | 1.86±0.88          | 7.48                                       | 1.31±0.08          |
| II nutrient addition  | 27.86                                     | 12.50±2.18         | 13.06                               | 1.12±0.52          | 6.92                                       | 1.33±0.05          |
| III nutrient addition | 33.21                                     | 14.61±0.79         | 12.32                               | 3.02±0.78          | 6.99                                       | 1.37±0.05          |
| IV nutrient addition  | 39.95                                     | 21.35±0.38         | 15.19                               | 3.40±0.23          | 7.11                                       | 1.49±0.18          |
